# Supplementary material
Source: PubMed Central journal article supplement (PMC7964651)
Supplement: 3333_table.pdf [file 3333_table.pdf]

**On-line Table: Demographics and MRI features for each tumor**

| No. | Age (yr) | Sex | Tumor            | T2 Intensity <sup>a</sup> | Enhancement <sup>b</sup> | Location    | Tumor Status | Mean ADC (10 <sup>-6</sup> mm <sup>2</sup> /s) |
|-----|----------|-----|------------------|---------------------------|--------------------------|-------------|--------------|------------------------------------------------|
| 1   | 35       | F   | Chondrosarcoma   | High                      | 0                        | Clival      | New          | 2156                                           |
| 2   | 30       | F   | Chondrosarcoma   | High                      | 2                        | Pterygoid   | New          | 1943                                           |
| 3   | 49       | F   | Chondrosarcoma   | High                      | 2                        | Petroclival | New          | 1722                                           |
| 4   | 3        | M   | Classic chordoma | High                      | 1                        | Clival      | New          | 1449                                           |
| 5   | 55       | F   | Classic chordoma | High                      | 1                        | Petroclival | Recurrent    | 1612                                           |
| 6   | 11       | F   | Classic chordoma | High                      | 0                        | Clival      | New          | 1303                                           |
| 7   | 35       | M   | Classic chordoma | High                      | 1                        | Clival      | New          | 1382                                           |
| 8   | 60       | M   | Classic chordoma | High                      | 1                        | Clival      | Residual     | 1631                                           |
| 9   | 37       | M   | Chondrosarcoma   | High                      | 1                        | Clival      | New          | 2280                                           |
| 10  | 36       | F   | Classic chordoma | High                      | 2                        | Clival      | New          | 1460                                           |
| 11  | 2        | F   | PD Chordoma      | Low                       | 1                        | Clival      | New          | 776                                            |
| 12  | 7        | M   | PD Chordoma      | Low                       | 1                        | Clival      | New          | 977                                            |
| 13  | 84       | M   | Chondrosarcoma   | High                      | NA                       | Clival/PS   | New          | 2576                                           |
| 14  | 53       | F   | Chondrosarcoma   | High                      | 2                        | Clival      | New          | 1977                                           |
| 15  | 36       | M   | Chondrosarcoma   | High                      | 2                        | Petroclival | Residual     | 1789                                           |
| 16  | 64       | F   | Classic chordoma | Mixed                     | 0                        | Clival      | New          | 1482                                           |
| 17  | 8        | M   | PD Chordoma      | Low                       | 1                        | Clival      | New          | 871                                            |
| 18  | 28       | F   | Chondrosarcoma   | High                      | 1                        | Petroclival | New          | 2080                                           |
| 19  | 38       | F   | Chondrosarcoma   | High                      | 2                        | Petroclival | New          | 1933                                           |

**Note:**—PS = planum sphenoidale.

<sup>a</sup> T2-intensity relative to gray matter.

<sup>b</sup> Enhancement pattern was graded as the following: 0 = little or none, 1 = heterogeneous, 2 = >90% solid enhancement.
